**Word count**

Abstract: 247

Total: 4204

Number of figures: 6

# **Deficiency of MicroRNA-181a Results in Transcriptome-Wide Cell Specific Changes in the Kidney that Lead to Elevated Blood Pressure and Salt Sensitivity**

**Short title:** MicroRNA-181a and Blood Pressure

Madeleine R. Paterson, BSc<sup>1,2</sup>; Kristy L. Jackson, PhD<sup>2,3</sup>; Malathi I. Dona, PhD<sup>4</sup>; Gabriella E. Farrugia, BSc<sup>4</sup>; Bruna Visniauskas, PhD<sup>5</sup>; Anna M. D. Watson, PhD<sup>2,6</sup>; Chad Johnson, MSc<sup>7</sup>; Minolfa C. Prieto, MD, PhD<sup>5</sup>; Roger G. Evans, PhD<sup>8</sup>; Fadi Charchar, PhD<sup>9,10</sup>; Alexander R. Pinto, PhD<sup>3,11</sup>; Francine Z. Marques, PhD<sup>1,12\*</sup>; Geoffrey A. Head, PhD<sup>2,13\*</sup>

<sup>1</sup>Hypertension Research Laboratory, School of Biological Sciences, Faculty of Science, Monash University, Melbourne, Australia; Monash University, Melbourne, Australia; <sup>2</sup>Neuropharmacology Laboratory, Baker Heart and Diabetes Institute, Melbourne, Australia; <sup>3</sup>Drug Discovery Biology, Faculty of Pharmacy and Pharmaceutical Sciences, Monash University Parkville, Australia; <sup>4</sup>Cardiac Cellular Systems Laboratory, Baker Heart and Diabetes Institute, Melbourne, Australia; <sup>5</sup>Department of Physiology, School of Medicine, Tulane University, New Orleans, the USA; <sup>6</sup>Department of Diabetes, Central Clinical School, Monash University, Melbourne, Australia; <sup>7</sup>Monash Micro Imaging, Monash University, Melbourne, Australia; <sup>8</sup>Cardiovascular Disease Program, Biomedicine Discovery Institute and Department of Physiology, Monash University, Melbourne, Australia; <sup>9</sup>Health Innovation and Transformation Centre, Federation University, Ballarat, Australia; <sup>10</sup>Department of Physiology, University of Melbourne, Melbourne, Australia; <sup>11</sup>Centre for Cardiovascular Biology and Disease Research, La Trobe University, Melbourne, Australia; <sup>12</sup>Heart Failure

Research Group, Baker Heart and Diabetes Institute, Melbourne, Australia; <sup>13</sup>Department of Pharmacology, Monash University, Melbourne, Australia.

\*Contributed equally as senior authors

**Correspondence to:** Geoffrey A. Head, Neuropharmacology Laboratory, Baker Heart and Diabetes Research Institute, P.O. Box 6492, St Kilda Road Central, Melbourne, Victoria 8008, Australia. E-mail: [geoff.head@baker.edu.au](mailto:geoff.head@baker.edu.au)

Tel: +61-3-8532-1330 Fax: +61-3-8532-1100

## Abstract

MicroRNA miR-181a is down-regulated in the kidneys of hypertensive patients and hypertensive mice. *In vitro*, miR-181a is a posttranslational inhibitor of renin expression, but pleiotropic mechanisms by which miR-181a may influence blood pressure (BP) are unknown. Here we determined whether deletion of miR-181a/b-1 *in vivo* changes BP and the molecular mechanisms involved at the single-cell level. We developed a knockout mouse model lacking miR-181a/b-1 genes using CRISPR/Cas9 technology. Radio-telemetry probes were implanted in twelve-week-old C57BL/6J wild-type and miR-181a/b-1 knockout mice. Systolic and diastolic BP were 4-5mmHg higher in knockout compared with wild-type mice over 24-hours ( $P<0.01$ ). Compared with wild-type mice, renal renin was higher in the juxtaglomerular cells of knockout mice. BP was similar in wild-type mice on a high (3.1%) versus low (0.3%) sodium diet ( $+0.4\pm 0.8$ mmHg) but knockout mice showed salt sensitivity ( $+3.3\pm 0.8$ mmHg,  $P<0.001$ ). Since microRNAs can target several mRNAs simultaneously, we performed single-nuclei RNA-sequencing in 6,699 renal cells. We identified 12 distinct types of renal cells, all of which had genes that were dysregulated. This included genes involved in renal fibrosis and inflammation such as *Stat4*, *Col4a1*, *Cd81*, *Flt3l*, *Cxcl16*, *Smad4*. We observed up-regulation of pathways related to the immune system, inflammatory response, reactive oxygen species and nerve development, consistent with higher tyrosine hydroxylase. In conclusion, downregulation of the miR-181a gene led to increased BP and salt sensitivity in mice. This is likely due to an increase in renin expression in juxtaglomerular cells, as well as microRNA-driven pleiotropic effects impacting renal pathways associated with hypertension.

**Key words:** blood pressure, renin, microRNA, single-cell RNA-sequencing, salt, sodium.

## 1 **Introduction**

2 MicroRNAs (miRs) are small non-coding RNAs known for their ability to regulate entire  
3 physiological pathways at the post-transcriptional level, usually by binding to the 3'  
4 untranslated region (UTR) of specific messenger RNA (mRNA) molecules.<sup>1</sup> MiRs have  
5 emerged in clinical medicine as therapeutic drugs and also as biomarkers of disease  
6 pathology.<sup>2</sup> In the cardiovascular field, an important role for miRs has been suggested for  
7 hypertension<sup>3</sup>, heart failure, arrhythmias, and acute coronary syndrome.<sup>4</sup> Of particular  
8 interest is miR-181a, which can bind to the 3'UTR of renin mRNA and downregulate renin  
9 levels *in vitro*.<sup>5</sup> MiR-181a is also downregulated in the kidneys of patients with hypertension  
10 compared with those with normal blood pressure (BP),<sup>5</sup> and both circulating and renal miR-  
11 181a are correlated with levels of BP.<sup>6</sup>

12         Similar to humans, the kidneys of genetically hypertensive mice have lower levels of  
13 miR-181a and higher levels of renin compared with their normotensive counterparts.<sup>7</sup>  
14 Moreover, in the human kidney, renin and miR-181a are co-localised in the epithelial cells of  
15 the collecting ducts.<sup>6</sup> Contrary to juxtaglomerular renin, intratubular renin is not released into  
16 the circulation. Rather, it has been shown to act in an autocrine or paracrine manner,<sup>8</sup>  
17 regulating the intra-renal renin-angiotensin system (RAS). Furthermore, hyperactivity of the  
18 intratubular RAS can affect both sodium sensitivity and BP. However, due to the pleiotropic  
19 capacity of miRNAs, it is likely that miR-181a also regulates BP via genes other than renin in  
20 a tissue as heterogeneous as the kidney. Thus, understanding the precise pathophysiological  
21 and molecular roles of miR-181a may provide a novel modality for preventing cardiovascular  
22 disease by treating hypertension.

23         In the current study, we deleted miR-181a/b-1 to determine its effects on BP and  
24 sensitivity to salt. To determine miR-181a mechanism of action we investigated the renal

25 transcriptome at the single-cell level in mice. We describe the development of a new  
26 CRISPR/Cas9 miR-181a/b-1 global knockout (KO) model, which has lower but not total  
27 absence of miR-181a, to replicate the levels of miR-181a observed in human hypertension.<sup>5</sup>  
28 We combined physiological and molecular studies in the first report to describe the  
29 pleiotropic role of a miR at the single-cell level to control BP.

30

## 31 **Methods**

32 Expanded methodology is available in the online-only supplement.

## 33 **Animals**

34 All experiments and surgical procedures were approved by the Alfred Medical Research  
35 Education Precinct Animal Ethics Committee (E/1617/2016/B) and conducted in accordance  
36 with the Australian Code for the Care and Use of Animals for Scientific Purposes, in line  
37 with international standards. Experiments were conducted on age-matched C57BL/6J (wild-  
38 type, WT, n=31) and homozygous KO (n=33) mice with global deletion of the gene miR-  
39 181a/b-1 (but miR-181a/b-2 gene was left intact). Food and water were accessible *ad libitum*  
40 (Chow pellets, “Irradiated Rat and Mouse Cubes” from Specialty Feeds, Glen Forrest, 0.2%  
41 sodium).

## 42 **Salt sensitivity**

43 To determine salt sensitivity, a separate group of WT and miR-181a/b-1 KO mice were fed  
44 *ad libitum* a low (0.03% sodium) and high (3.0% sodium) sodium diets (Specialty feeds, Glen  
45 Forrest). Animals were randomly allocated to receive each of the diets in turn for one week.

## 46 **Cardiovascular Measurements**

47 Radiotelemetry transmitters (model TA11PA-C10; Data Sciences International, St Paul, MN)  
48 were implanted in 12-week old mice, as detailed in the online-only Data Supplement and per  
49 our previous studies (n=12 WT, n=15 KO).<sup>9</sup> Systolic (SAP), diastolic (DAP) and mean  
50 arterial blood pressure (MAP), heart rate (HR) and locomotor activity were measured in  
51 conscious, unrestrained mice from 10-days after surgery for a period of 48-hours. To further  
52 determine the contribution of the RAS versus the sympathetic nervous system (SNS), we also  
53 measured cardiovascular parameters for 30-minutes following administration of pentolinium  
54 (5mg/kg; Sigma-Aldrich) to mice pre-treated with enalaprilat (an angiotensin converting  
55 enzyme, ACE, inhibitor, at 1mg/kg; Merck & Co.) during the active (dark) and inactive  
56 (light) period as previously described.<sup>7</sup>

## 57 **Tyrosine hydroxylase staining**

58 Kidneys were fixed with 10% neutral buffered formalin, dehydrated and embedded in  
59 paraffin. Tyrosine hydroxylase (TH) staining was performed on kidney sections from WT  
60 (n=6) and miR-181a/b-1 KO (n=5) mice. The percentage of TH staining in the cortical  
61 tubules was semi-quantitatively assessed as previously described<sup>7</sup> (see online-only Data  
62 Supplement).

## 63 **Measurement and localisation of renin mRNA and protein in the kidney**

64 Localisation of renin mRNA was determined in coronal tissue sections using the RNAScope  
65 2.5 Brown Assay (Advanced Cell Diagnostics, Hayward, CA) according to manufacturer's  
66 instructions. Localisation of renin protein was determined using immunostaining by the  
67 peroxidase technique. Briefly, formalin fixed mouse kidney sections (2-3  $\mu$ m) were processed  
68 for renin specific immunolocalization as described previously.<sup>10</sup> Renin kidney  
69 immunolocalization was assessed using a polyclonal rabbit renin antibody (provided as a gift

70 by Dr. R. Ariel Gomez, University of Virginia, VA-USA) at a 1:200 dilution. Peroxidase  
71 activity was visualized with 0.1% 3,3'-diaminobenzidine tetrahydrochloride (DAB, Sigma, St.  
72 Louis, MO), followed by counterstaining and mounting with using aqueous mounting media  
73 (Biomeda, Fisher Scientific). Sections were imaged using bright field microscopy (Olympus  
74 BX53 Light Microscope, Japan). A macro (developed by C.J.) was used to identify the amount  
75 of renin and renin positive juxtaglomerular cells in the FIJI processing package. All  
76 juxtaglomerular apparatus (JGA) visible in the slide were counted (average 185 in WT and 192  
77 in KO mice for renin protein and 163 in WT and 177 in KO for renin RNA). However, due to  
78 technical difficulties and laboratory/border closures the sample size was small (n=2-4 per  
79 group), but number of medulla images assessed per sample were high (average 8.8  
80 regions/sample).

### 81 **Single-nuclei RNA-sequencing**

82 Single-cell suspensions were prepared from the kidneys of male WT (n=4) and miR-181a/b-1  
83 KO (n=4) mice. Mice were euthanised, perfused with PBS and the kidneys isolated. Kidneys  
84 were weighed and 0.25g was minced. The same region was selected for consistency, and  
85 represented a combination of medulla and cortex. The minced kidney tissue was digested  
86 with dispase II and collagenase IV, filtered and resuspended. Antibody staining was  
87 performed according to the online-only Data Supplement, and live nucleated cells were  
88 sorted using fluorescence-activated cell sorting (FACS). Single-nuclei mRNA libraries were  
89 prepared per strain using the 10X Genomics pipeline. The Cell Ranger software version 3.1.0  
90 (10X Genomics) was used to process the raw sequencing data before subsequent analyses.  
91 Downstream analysis on kidney single-nuclei RNA-sequencing (scRNA-seq) dataset was  
92 performed using Seurat R package 3.2.0.<sup>11</sup> In order to explore the transcriptional  
93 heterogeneity and to undertake cell clustering, dimensionality was reduced using principal  
94 component analysis (PCA), selecting 40 PC. PC loadings were used as inputs for a graph-

95 based approach to clustering of cells at a resolution of 1.2, and for t-distributed stochastic  
96 neighbour embedding (t-SNE) for two-dimensional visualization purposes. Identified clusters  
97 were manually annotated based on features corresponding to canonical cell-type genes before  
98 merging clusters corresponding to the same cell type (Table S1). Differentially expressed  
99 (DE) genes were identified, between WT and KO samples, by identifying the genes  
100 expressed in at least 10% of cells in at least one of the groups being compared. To test for  
101 differential expression, MAST was used including cellular detection rate as a covariate  
102 (MASTcpmDetRate).

### 103 **Statistical Analysis**

104 All cardiovascular data were analysed using a mixed model, repeated measure (split-plot)  
105 analysis of variance (ANOVA) using Microsoft Excel 2016. The main effect of strain was  
106 further analysed using a series of non-orthogonal contrasts. A Bonferroni correction was used  
107 to correct for multiple comparisons with a Greenhouse-Geisser correction to adjust for  
108 violation of sphericity. GraphPad Prism (version 7) package was used for the statistical  
109 analyses and graphing of tissue weight, TH, miR-181a and renin expression. Two-tailed  
110 unpaired t-tests were used to compare single values from WT and KO mice. All data are  
111 presented as mean  $\pm$  SEM. Two-tailed  $P < 0.05$  was considered statistically significant.

112

## 113 **Results**

### 114 **Deletion of miR-181a increased blood pressure**

115 The successful deletion of the miR-181a/b-1 gene was achieved using CRISPR-Cas9 genome  
116 editing (Figure 1). Mice were genotyped using genomic DNA which was confirmed by PCR.  
117 miRNA-181a abundance was 10-fold lower in miR-181a/b-1 KO mice compared to WT  
118 mice, while heterozygous mice had intermediate levels of miR-181a ( $P < 0.001$ , Figure 1).



119 Mice then underwent a 5-week experimental protocol (Figure 1). On average miR-181a/b-1  
120 KO mice had consistently elevated BP over a 24-hour period ( $P<0.001$ , Figure 2). Average  
121 24-hour mean arterial pressure (MAP) was 4.6mmHg higher in miR-181a/b-1 KO mice  
122 compared with WT mice ( $P<0.01$ , Figure 2). Similarly, miR-181a/b-1 KO mice had higher  
123 24-hour SAP (mean difference 4.9mmHg,  $P<0.01$ ) and DAP (mean difference 4.4mmHg,  
124  $P<0.01$ ) than WT mice (Figure 2). The difference in BP between the two strains was most  
125 prominent during the dark (active) period, when microRNA-181a/b-1 KO mice (n=15) had  
126 greater MAP (+ 5.6 mmHg,  $P=0.015$ ), SAP (+6.0 mmHg,  $P=0.01$ ), and DAP (+5.4 mmHg,  
127  $P=0.02$ ) than WT mice (n=12) (Figure 2). The MAP, SAP and DAP of KO mice were not  
128 different to WT during the light inactive period ( $P>0.05$ , Figure 2). MicroRNA-181a/b-1 KO  
129 mice had a higher heart rate (HR) than WT mice in the dark (active) period ( $P=0.05$ ).  
130 Activity was 33% greater in miR-181a/b-1 KO mice than WT mice during the dark (active)  
131 period (+0.5,  $P=0.015$ , Figure 2). However, no detectable difference in activity was observed  
132 during the light (inactive) period or on average over 24-hours. The depressor response to  
133 ACE inhibition (enalaprilat) was similar in the two strains (Figure S1). Further, the depressor  
134 response to ganglion blockade by pentolinium, after pre-treatment with enalaprilat, was also  
135 similar in WT and KO mice during the dark (active) and light (inactive) periods (Figure S1).  
136 Deletion of miR-181a did not significantly affect responses to dirty cage, feeding or restraint  
137 stress challenges (Figure S1).

138 Food and water intake did not differ between WT and miR-181a/b-1 KO mice (Figure  
139 S2). Cardiac weight index, determined as heart to body weight ratio, was 21% greater in miR-  
140 181a/b-1 KO mice than WT mice ( $P<0.001$ , Figure 2). There were no detectable differences  
141 in (body-weight adjusted) kidney or lung weight index between miR-181a/b-1 KO and WT  
142 mice, while KO mice had larger spleens (+34%,  $P<0.05$ , Figure 2). TH staining in the kidney,  
143 which has been used as a marker of sympathetic innervation, was 2.5-fold greater in miR-

144 18a/b-1 KO mice ( $5.2\pm 1.1\%$ ) than WT mice ( $2.0\pm 0.3\%$ ,  $P=0.03$ , Figure 3). Together, our  
145 data suggests miR-181a is involved in BP regulation, leads to cardiac hypertrophy, and  
146 increases renal sympathetic activity, but is not involved in the pressor responses to aversive  
147 stress.

#### 148 **Deletion of miR-181a increased renal renin**

149 Since miR-181a binds to and down-regulates renin *in vitro*, it is likely that renin levels are  
150 affected. Accordingly, JGA more frequently expressed renin mRNA in miR-181a/b-1 KO  
151 mice than WT mice (mean $\pm$ SEM: WT  $48.9\pm 1.5\%$  vs KO  $58.3\pm 2.1\%$ ,  $P=0.02$ , Figure 3) and  
152 protein (WT  $32.1\pm 4.4\%$  vs KO  $39.0\pm 1.2\%$ ,  $P=0.14$ , Figure 3). Higher renin mRNA, but not  
153 protein, was also detected in the medulla (WT  $4.2\pm 1.0\%$  vs KO  $8.7\pm 3.1\%$ , Figure S3). These  
154 data suggest that renal renin, particularly in the JGA, is overexpressed in the miR-181a/b-1  
155 KO mice.

#### 156 **Deletion of miR-181a increased salt sensitivity**

157 WT mice had similar 24-hour MAP when fed a high or low salt diet (mean difference  
158  $0.4\text{mmHg}$ , Figure 4). In contrast, miR-181a/b-1 KO mice showed a degree of salt sensitivity  
159 (Figure 4). Most notably, DAP was  $4.8\text{mmHg}$  greater during the dark (active) period and  
160  $3.2\text{mmHg}$  greater during the light (inactive) period in miR-181a/b-1 KO mice fed a high salt  
161 diet compared to a low salt diet ( $P<0.05$ , Figure 4). Similarly, a high salt diet led to increased  
162 SAP during the dark (active,  $+3.8\text{mmHg}$ ,  $P<0.05$ ) but not during the light (inactive,  
163  $+2.0\text{mmHg}$ ,  $P=0.08$ ) period, compared with miR-181a/b-1 KO mice fed a low salt diet.  
164 There were no detectable differences in urine output, water and food consumption between  
165 miR-181a/b-1 KO and WT mice on any of the diets (Figure S2). However, as expected, when  
166 fed a high salt diet, both miR-181a/b-1 KO and WT mice had greater water consumption and

167 urine output than when fed a low salt diet ( $P < 0.001$ , Figure S2). Together, these results  
168 indicate that miR-181a/b-1 KO mice are more salt-sensitive than WT mice.

### 169 **Single-Nuclei RNA-sequencing**

170 To determine the impact of miR-181a KO on renal cell types, we performed scRNA-seq, on  
171 nucleated kidney cells (see Online-only Methods) isolated and pooled from four WT and four  
172 miR-181a/b-1 KO mice. scRNA-seq yielded 6,699 cells (3,361 cells sequenced at 139,800  
173 reads/cell for WT and 3,338 cells sequenced at 140,517 reads/cell for miR-181a/b-1 KO  
174 mice) that passed quality control in our analysis pipeline (Figure 5A and Figure S4A).  
175 Following cell clustering, we identified 12 distinct major cell populations in both WT and  
176 miR-181a/b-1 KO strains (Figure 5B) including 22 cell populations that corresponded to  
177 macrophages, endothelial cells, juxtaglomerular cells, cells of the proximal tubule (PT),  
178 dendritic cells (DC), natural killer cells (NK), T cells and B cells (Figure 5C and S4B, Table  
179 S1). Importantly, many of the most highly expressed genes in JGA cells were previously  
180 identified as part of human reninomas.<sup>12</sup>

181 Analysis of gene expression profiles revealed miR-181a/b-1 KO impacts multiple cell  
182 populations to varying degrees with macrophages and endothelial cells most impacted  
183 (Figure 6A and Table S2). However, it should be noted that sensitivity for discovering  
184 differentially expressed genes is reduced for less abundant cell types in our dataset (Figure  
185 S5), which is a common phenomenon in scRNA-seq.<sup>13</sup> Examination of the top ten up- and  
186 down-regulated genes in miR-181a/b-1 KO mice showed that most genes are cell-specifically  
187 regulated (Figure 6 and Table S2). Amongst the top up-regulated genes were *Stat4* in B cells  
188 (fold change=11, expression validated by real-time PCR in Figure S6) which is associated  
189 with inflammation,<sup>14</sup> collagen genes associated with fibrosis such as *Col4a1* (fold  
190 change=1.5) in endothelial cells, *Cd81* a marker of renal-resident macrophages<sup>15</sup> (fold  
191 change=1.2), *Flt3l* found in natural killer cells (only expressed in miR-181a/b-1 KO mice)

192 which exacerbates accumulation of T cells in the kidney,<sup>16</sup> *Malat1* found in macrophages  
193 (fold change=1.2) shown to be higher in hypertensive patients and blockade of *Malat1* was  
194 able to lower BP in an animal model,<sup>17</sup> *Notch2* in proximal tubules (only expressed in miR-  
195 181a/b-1 KO mice) which is involved in nephron development,<sup>18</sup> and *Polr2f* found in  
196 proximal tubules (fold change=2.2) previously associated with established hypertension in a  
197 meta-analysis.<sup>19</sup> Several of the up-regulated genes have been previously demonstrated to have  
198 a role in renal injury, inflammation and fibrosis including *Cxcl16*<sup>20</sup> found in distal convoluted  
199 tubule cells (fold change=2.1), and *Smad4* found in collecting duct principal cells (fold  
200 change=1.3).<sup>21</sup> The function of most of the down-regulated genes we identified is unknown at  
201 least in the context of hypertension and renal function. This is not surprising considering that  
202 when miR-181a is downregulated, genes that are directly controlled by this miR would be  
203 expected to be upregulated. We still identified a few relevant genes including *Ormdl1* in  
204 fibroblasts (absent in KO) associated with BP in a genome-wide association study,<sup>22</sup> and  
205 *Tmem27* in proximal tubule cells (fold change=-1.5) which is an ACE2 analogue also  
206 involved in nitric oxide synthesis.<sup>23</sup>

207 Gene ontology analyses were then performed to determine pathways altered by miR-  
208 181a/b-1 deficiency. Most identified pathways were down-regulated in dendritic cells,  
209 endothelial cells, macrophages and juxtaglomerular cells (Figure 6D, Tables S3 and S5). In  
210 juxtaglomerular cells, we observed the down-regulation of pathways involved in interleukin-  
211 10 (IL10) production, which is anti-inflammatory and limits BP increase.<sup>24</sup> While many  
212 down-regulated pathways identified in the other cell types were involved in ribosomal units  
213 and translation, in endothelial cells we observed the up-regulation of pathways related to  
214 axonogenesis and nerve development, which is consistent with our findings regarding higher  
215 levels of TH, which point to higher sympathetic activity. Genes in pathways associated with  
216 the activation of the immune system in macrophages, B and T cell populations, and

217 inflammatory response (e.g., interleukin-6 secretion, T cell-mediated cytotoxicity) were also  
218 up-regulated. Moreover, there was an up-regulation of pathways involved in the regulation of  
219 reactive oxygen species (ROS) metabolic processes in macrophages and B cells. Overall, this  
220 data supports an effect of miR-181a/b-1 on many mechanisms that are associated with  
221 hypertension including nerve activation, immune system activation, inflammation and ROS.

222

## 223 **Discussion**

224 Here we show that a 10-fold reduction in miR-181a/b, through the use of a new  
225 CRISPR/Cas9 KO model, resulted in higher BP, cardiac hypertrophy and caused a degree of  
226 salt sensitivity. Similar to our findings from kidneys obtained from humans with confirmed  
227 hypertension,<sup>5</sup> we were able to reduce (but not completely remove) miR-181a expression in  
228 this model, while renal renin mRNA and protein appeared increased, particularly in  
229 juxtaglomerular cells. These data support that miR-181a exerts post-transcriptional control  
230 over renal renin expression. Our single-nuclei transcriptomic analyses, however, defined a  
231 pleiotropic effect of miR-181a in BP regulation by the kidneys that goes beyond renin  
232 regulation. Indeed, miR-181a also impacted pro-inflammatory IL6 and anti-inflammatory  
233 IL10 pathways, known to impact sodium handling.<sup>25</sup> Finally, the elevated TH staining  
234 observed in the kidneys of miR-181a/b-1 KO mice is consistent with increased nerve  
235 development identified by scRNA-seq and may point to a role for the SNS in BP regulation  
236 in this model. Together, our results support the hypothesis that deletion of miR-181a leads to  
237 elevated BP through multiple classical (RAS, SNS) and emerging (non-coding RNA, pro-  
238 inflammatory) mechanistic pathways.

239 We have previously shown that low levels of renal miR-181a are associated with  
240 increased BP in human and pre-clinical models.<sup>7,26,27</sup> Furthermore, circulating plasma levels

241 of miR-181a were also associated with BP in two independent cohorts.<sup>28</sup> Likewise,  
242 expression of miR-181a in monocytes was found to be negatively correlated with systolic BP  
243 in obese patients.<sup>29</sup> Others have demonstrated that mice lacking miR-181a exhibit cardiac  
244 hypertrophy and cardiac dysfunction.<sup>30</sup> These observations and our current data showing  
245 cardiac hypertrophy in miR-181a/b-1 KO mice likely reflect the effects of higher BP, since  
246 expression of miR-181a in the heart is extremely low (data not shown). Our findings indicate  
247 a role of miR-181a in BP regulation *in vivo*, and expand our knowledge about the  
248 mechanisms involved at the single-cell level in the kidney. Here, we show for the first time  
249 that global deletion of the miR-181a/b-1 genes *in vivo* results in chronically elevated BP over  
250 a 24-hour period and pinpoint several novel mechanisms in the kidney. Thus, we demonstrate  
251 that under-expression of miR-181a is not merely a consequence of high BP, but rather a  
252 driving factor leading to the development of elevated BP.

253         In the present study, we found that miR-181a/b-1 KO mice had higher levels of renin  
254 in the JGA. In addition to JGA, in the human kidney we previously reported that miR-181a  
255 co-localizes with renin in the distal nephron.<sup>28</sup> Collecting duct renin is thought to act within  
256 the intrarenal RAS in an autocrine or paracrine manner rather than systemically.<sup>8,32</sup> In  
257 addition to renin, both ACE and angiotensinogen, components required for the synthesis of  
258 angiotensin (Ang) II, are present within the renal tubules. Given that tubular Ang II increases  
259 epithelial sodium transport within the collecting duct, it has been suggested that  
260 overexpression of renin in this region can promote sodium reabsorption and consequent  
261 increases in BP. Indeed, mice which overexpress collecting duct renin showed increased BP  
262 and salt sensitivity.<sup>33</sup> Conversely, mice with specific deletion of the *Ren-1c* gene in the  
263 collecting duct, or reduced local renin activity due to cell-type specific deficiency of the  
264 prorenin receptor (*Atp6ap2*) gene in collecting duct cells, both elicit attenuated Ang II-  
265 induced hypertension and decreased distal sodium reabsorption.<sup>34,35</sup> This hypothesis is

266 supported by the observation in the present study that a high salt diet leads to increased BP in  
267 miR-181a/b-1 KO mice but not in WT mice. Further evidence that renin is acting in an  
268 autocrine manner is provided by the observed similar depressor response to the ACE inhibitor  
269 enalaprilat in WT and miR-181a/b-1 KO mice fed a control diet (Figure S1). Given that  
270 enalaprilat inhibits production of circulating Ang II, the equal decrease in MAP in both wild-  
271 type and miR-181a/b-1 KO mice suggests that the increased renin, which appears to be in the  
272 kidneys of miR-181a/b-1 KO mice, is not released into the circulation. Therefore, it is likely  
273 that medullary renin mRNA is promoting greater sodium retention, thus, increasing BP in  
274 miR-181a/b-1 KO mice. This also suggests that the decrease in BP is not only due to miR-  
275 181a actions on renin, but that other targets are important. However, to confirm this  
276 hypothesis we would need to measure levels of circulating renin, which was not possible in  
277 the current investigation.

278         Our previous findings indicate there may be a link between the SNS and miR-181a.<sup>7</sup>  
279 Indeed, renal denervation lowered BP and normalised expression of miR-181a and renin in  
280 Schlager hypertensive (BPH/2J) mice with neurogenic hypertension, but not in normotensive  
281 control mice.<sup>36</sup> Since BPH/2J mice and miR-181a/b-1 KO mice have lower miR-181a levels,  
282 one may expect to see altered sympathetic activity in the KO mice.<sup>7</sup> However, on a normal-  
283 salt diet, the depressor response to ganglionic blockade in miR-181a/b-1 KO mice was  
284 similar to that of WT mice, both in the active and inactive period. Consistent with this, there  
285 were no detectable differences in the sympathetically mediated pressor responses to stress  
286 tests between wild-type and miR-181a/b-1 KO mice. Thus, it would appear that the deletion  
287 of the miR-181a gene does not affect regulation of the SNS. On the contrary, TH staining, a  
288 marker of sympathetic innervation, was greater in miR-181a/b-1 KO mice than wild-type  
289 mice, consistent with our scRNA-seq data. Combined with recent findings showing that renal

290 denervation reduced BP and restored levels of miR-181a in the hypertensive mice,<sup>36</sup> this may  
291 imply that the SNS has a role, either directly or indirectly, in the regulation of miR-181a.

292 We also identified juxtaglomerular cells characterised by the expression of *Ren1*,  
293 *My19*, *Mgp*, *Rgs5* and *Acta2*, previously characterised in human reninomas,<sup>12</sup> that had not  
294 been previously characterised by scRNA-seq. However, given that miRNAs can bind to and  
295 regulate many mRNA targets, a single miRNA can have pleiotropic effects on many different  
296 biological pathways above and beyond the renin gene *Ren1*.<sup>37</sup> Genes co-expressed with miR-  
297 181a were previously determined using next-generation RNA-sequencing.<sup>6</sup> Renal miR-181a  
298 expression was co-expressed with decreased mRNAs common to mitochondrial respiratory  
299 function, and with increased expression of mRNAs common to signalling cascades of  
300 immunity and inflammation.<sup>6</sup> In the past decade it has been well established that the  
301 pathogenesis of hypertension is due, in part, to immune system dysregulation.<sup>38</sup> This is  
302 relevant as previously miR-181a has been shown to regulate development of T-cells,<sup>39,40</sup>  
303 consistent with the increased spleen size we observed. Furthermore, miR-181a has various  
304 immune targets including toll-like receptor 4,<sup>41</sup> interleukin-1 $\alpha$ , interleukin-1 $\beta$ , IL6 and  
305 TNF $\alpha$ .<sup>42,43</sup> For the first time, we have studied the hypertensive mouse kidney at a single-cell  
306 level, to further elucidate the pleiotropic effects of miR-181a, and validated that it affects  
307 some of these pathways including IL6 signalling pathways.

308 We acknowledge our study has some limitations. Due to gene proximity, both miR-  
309 181a-1 and miR-181b-1 genes were deleted in mice. There are, however, two genes that code  
310 for mature miR-181a: miR-181a-1 and miR-181a-2.<sup>44</sup> The global deletion of miR-181a/b-1 in  
311 mice has been found to have a greater impact on primary and mature miR-181a levels, as  
312 well as immune driven function, than KO of miR-181a/b-2.<sup>45</sup> Given that complete deficiency  
313 of miR-181a/b-1 and miR-181a/b-2 in mice does not appear to be compatible with life,<sup>46</sup>  
314 miR-181a/b-1 is probably the main gene responsible for miR-181a expression. Because low



315 (but not total absence of) expression of miR-181a is observed in the kidneys of human  
316 hypertensive patients,<sup>5</sup> the miR-181a/b-1 genes were selected for deletion in the current  
317 project. MiR-181a/b was previously shown to regulate endothelial dysfunction via TGF- $\beta$   
318 signalling in vascular smooth muscle cells, leading to higher pulse wave velocity and systolic  
319 BP.<sup>31</sup> However, human microarray data revealed that, unlike miR-181a, miR-181b is not  
320 differentially expressed in human hypertensive kidneys and appears to not regulate renin  
321 expression.<sup>5</sup> Therefore, it is anticipated that the changes in renin expression observed in the  
322 miR-181a/b-1 KO mice can be attributed predominantly to the deletion of the miR-181a-1  
323 gene. We also acknowledge that in this study we only analysed the BP and transcriptome of  
324 male mice. However, given that data previously obtained from two large cohorts of human  
325 hypertensive patients showed no sex differences in miR-181a expression,<sup>6</sup> we would not  
326 expect to see a difference in our model.

## 327 **Perspectives**

328 Our findings demonstrate that deficiency of miR-181a/b via global deletion of miR-181a/b-1  
329 gene leads to elevated BP and some salt sensitivity in mice, and the mechanisms involved at  
330 the single-nuclei level in the kidney. Our findings show that a single miRNA can influence a  
331 wide array of pathways in several cell types in a tissue as heterogeneous as the kidney,  
332 leading to a complex phenotype. While there are currently antihypertensive agents available  
333 which target the RAS, understanding how down-regulation of miR-181a can lead to elevated  
334 BP and salt sensitivity provides opportunities for the development of novel therapies to  
335 prevent, diagnose and treat hypertension.

336

337 **Acknowledgments**

338 We acknowledge the technical assistance of John-Luis Moretti. We thank Dr. R. Ariel Gomez  
339 from University of Virginia for the anti-renin antibody, and the Australian Genome Research  
340 Facility (AGRF) for high throughput sequencing, and the support it receives from the  
341 Commonwealth.

342

343 **Sources of Funding**

344 This work was supported by grants (GNT1104528, GNT1065714, GNT1188503) awarded to  
345 F.Z.M., R.E., F.J.C., A.R.P, and G.A.H from the National Health & Medical Research  
346 Council of Australia (NHMRC), and the National Institutes of Health (NIH-NIDDK,  
347 DK104375) and Tulane University Faculty Pilot Program awarded to M.C.P. K.J. and G.A.H.  
348 are supported by fellowships from the NHMRC, F.Z.M is supported by a National Heart  
349 Foundation Future Leader Fellowship. The Baker Heart & Diabetes Institute is supported in  
350 part by the Victorian Government's Operational Infrastructure Support Program.

351

352 **Disclosures**

353 None.

## References

1. Marques FZ, Booth SA, Charchar FJ. The emerging role of non-coding RNA in essential hypertension and blood pressure regulation. *J Hum Hypertens*. 2015;29:459-467.
2. Hanna J, Hossain GS, Kocerha J. The Potential for microRNA Therapeutics and Clinical Research. *Frontiers in Genetics*. 2019;10
3. Jusic A, Devaux Y, Action EU-CC. Noncoding RNAs in Hypertension. *Hypertension (Dallas, Tex. : 1979)*. 2019;74:477-492.
4. Romaine SP, Tomaszewski M, Condorelli G, Samani NJ. MicroRNAs in cardiovascular disease: an introduction for clinicians. *Heart*. 2015;101:921-928.
5. Marques FZ, Campaign AE, Tomaszewski M, Zukowska-Szczechowska E, Yang YHJ, Charchar FJ, Morris BJ. Gene Expression Profiling Reveals Renin mRNA Overexpression in Human Hypertensive Kidneys and a Role for MicroRNAs. *Hypertension*. 2011;58:1093-1098.
6. Marques FZ, Romaine SP, Denniff M, et al. Signatures of miR-181a on the Renal Transcriptome and Blood Pressure. *Mol Med*. 2015;21:739-748.
7. Jackson KL, Marques FZ, Watson AM, Palma-Rigo K, Nguyen-Huu TP, Morris BJ, Charchar FJ, Davern PJ, Head GA. A novel interaction between sympathetic overactivity and aberrant regulation of renin by miR-181a in BPH/2J genetically hypertensive mice. *Hypertension*. 2013;62:775-781.
8. Prieto-Carrasquero MC, Botros FT, Kobori H, Navar LG. Collecting duct renin: A major player in angiotensin II-dependent hypertension. *J Am Soc Hypertens*. 2009;3:96-104.
9. Davern PJ, Nguyen-Huu TP, La Greca L, Abdelkader A, Head GA. Role of the sympathetic nervous system in Schlager genetically hypertensive mice. *Hypertension*. 2009;54:852-859.

10. Prieto-Carrasquero MC, Harrison-Bernard LM, Kobori H, Ozawa Y, Hering-Smith KS, Hamm LL, Navar LG. Enhancement of collecting duct renin in angiotensin II-dependent hypertensive rats. *Hypertension*. 2004;44:223-229.
11. Stuart T, Butler A, Hoffman P, Hafemeister C, Papalexi E, Mauck WM, 3rd, Hao Y, Stoeckius M, Smibert P, Satija R. Comprehensive Integration of Single-Cell Data. *Cell*. 2019;177:1888-1902 e1821.
12. Martini AG, Xa LK, Lacombe MJ, Blanchet-Cohen A, Mercure C, Haibe-Kains B, Friesema ECH, van den Meiracker AH, Gross KW, Azizi M, Corvol P, Nguyen G, Reudelhuber TL, Danser AHJ. Transcriptome Analysis of Human Reninomas as an Approach to Understanding Juxtaglomerular Cell Biology. *Hypertension*. 2017;69:1145-1155.
13. McLellan MA, Skelly DA, Dona MSI, Squiers GT, Farrugia GE, Gaynor TL, Cohen CD, Pandey R, Diep H, Vinh A, Rosenthal NA, Pinto AR. High-Resolution Transcriptomic Profiling of the Heart During Chronic Stress Reveals Cellular Drivers of Cardiac Fibrosis and Hypertrophy. *Circulation*. 2020;142:1448-1463.
14. Kaplan MH. STAT4: a critical regulator of inflammation in vivo. *Immunol Res*. 2005;31:231-242.
15. Zimmerman KA, Bentley MR, Lever JM, Li Z, Crossman DK, Song CJ, Liu S, Crowley MR, George JF, Mrug M, Yoder BK. Single-Cell RNA Sequencing Identifies Candidate Renal Resident Macrophage Gene Expression Signatures across Species. *J Am Soc Nephrol*. 2019;30:767-781.
16. Lu X, Rudemiller NP, Privratsky JR, Ren J, Wen Y, Griffiths R, Crowley SD. Classical Dendritic Cells Mediate Hypertension by Promoting Renal Oxidative Stress and Fluid Retention. *Hypertension*. 2020;75:131-138.

- 17.Xue YZ, Li ZJ, Liu WT, Shan JJ, Wang L, Su Q. Down-regulation of lncRNA MALAT1 alleviates vascular lesion and vascular remodeling of rats with hypertension. *Aging (Albany NY)*. 2019;11:5192-5205.
- 18.Cheng HT, Kim M, Valerius MT, Surendran K, Schuster-Gossler K, Gossler A, McMahon AP, Kopan R. Notch2, but not Notch1, is required for proximal fate acquisition in the mammalian nephron. *Development*. 2007;134:801-811.
- 19.Marques FZ, Campain AE, Yang YH, Morris BJ. Meta-analysis of genome-wide gene expression differences in onset and maintenance phases of genetic hypertension. *Hypertension*. 2010;56:319-324.
- 20.Liang H, Ma Z, Peng H, He L, Hu Z, Wang Y. CXCL16 Deficiency Attenuates Renal Injury and Fibrosis in Salt-Sensitive Hypertension. *Sci Rep*. 2016;6:28715.
- 21.Meng XM, Huang XR, Xiao J, Chung AC, Qin W, Chen HY, Lan HY. Disruption of Smad4 impairs TGF-beta/Smad3 and Smad7 transcriptional regulation during renal inflammation and fibrosis in vivo and in vitro. *Kidney Int*. 2012;81:266-279.
- 22.Levy D, Ehret GB, Rice K, et al. Genome-wide association study of blood pressure and hypertension. *Nat Genet*. 2009;41:677-687.
- 23.Chu PL, Le TH. Role of collectrin, an ACE2 homologue, in blood pressure homeostasis. *Curr Hypertens Rep*. 2014;16:490.
- 24.Lima VV, Zemse SM, Chiao CW, Bomfim GF, Tostes RC, Clinton Webb R, Giachini FR. Interleukin-10 limits increased blood pressure and vascular RhoA/Rho-kinase signaling in angiotensin II-infused mice. *Life Sci*. 2016;145:137-143.
- 25.Norlander AE, Madhur MS. Inflammatory cytokines regulate renal sodium transporters: how, where, and why? *Am J Physiol Renal Physiol*. 2017;313:F141-F144.
- 26.Marques FZ, Campain AE, Tomaszewski M, Zukowska-Szczechowska E, Yang YH, Charchar FJ, Morris BJ. Gene expression profiling reveals renin mRNA

overexpression in human hypertensive kidneys and a role for microRNAs.

*Hypertension*. 2011;58:1093-1098.

27. Marques FZ, Romaine SP, Denniff M, et al. Signatures of miR-181a on renal transcriptome and blood pressure. *Mol. Med.* 2015;21:739-748.
28. Marques FZ, Romaine SP, Denniff M, et al. Signatures of miR-181a on the Renal Transcriptome and Blood Pressure. *Mol Med.* 2015;21:739-748.
29. Hulsmans M, Sinnaeve P, Van der Schueren B, Mathieu C, Janssens S, Holvoet P. Decreased miR-181a Expression in Monocytes of Obese Patients Is Associated with the Occurrence of Metabolic Syndrome and Coronary Artery Disease. *The Journal of Clinical Endocrinology & Metabolism*. 2012;97:E1213-E1218.
30. Das S, Kohr M, Dunkerly-Eyring B, Lee D, Bedja D, Kent O, Leung A, Henao-Mejia J, Flavell R, Steenbergen C. Divergent Effects of miR-181 Family Members on Myocardial Function Through Protective Cytosolic and Detrimental Mitochondrial microRNA Targets. *Journal of the American Heart Association*. 2017;6:e004694.
31. Hori D, Dunkerly-Eyring B, Nomura Y, Biswas D, Steppan J, Henao-Mejia J, Adachi H, Santhanam L, Berkowitz DE, Steenbergen C, Flavell RA, Das S. miR-181b regulates vascular stiffness age dependently in part by regulating TGF-beta signaling. *PLoS one*. 2017;12:e0174108.
32. Navar LG, Kobori H, Prieto MC, Gonzalez-Villalobos RA. Intratubular renin-angiotensin system in hypertension. *Hypertension*. 2011;57:355-362.
33. Ramkumar N, Ying J, Stuart D, Kohan DE. Overexpression of renin in the collecting duct causes elevated blood pressure. *Am J Hypertens*. 2013;26:965-972.
34. Ramkumar N, Stuart D, Rees S, Hoek AV, Sigmund CD, Kohan DE. Collecting duct-specific knockout of renin attenuates angiotensin II-induced hypertension. *Am. J. Physiol. Renal Physiol*. 2014;307:F931-938.

35. Prieto MC, Reverte V, Mamenko M, Kuczeriszka M, Veiras LC, Rosales CB, McLellan M, Gentile O, Jensen VB, Ichihara A, McDonough AA, Pochynyuk OM, Gonzalez AA. Collecting duct prorenin receptor knockout reduces renal function, increases sodium excretion, and mitigates renal responses in ANG II-induced hypertensive mice. *Am J Physiol Renal Physiol*. 2017;313:F1243-F1253.
36. Jackson KL, Gueguen C, Lim K, Eikelis N, Stevenson ER, Charchar FJ, Lambert GW, Burke SL, Paterson MR, Marques FZ, Head GA. Neural suppression of miRNA-181a in the kidney elevates renin expression and exacerbates hypertension in Schlager mice. *Hypertens Res*. 2020
37. Christopher AF, Kaur RP, Kaur G, Kaur A, Gupta V, Bansal P. MicroRNA therapeutics: Discovering novel targets and developing specific therapy. *Perspectives in clinical research*. 2016;7:68-74.
38. Drummond GR, Vinh A, Guzik TJ, Sobey CG. Immune mechanisms of hypertension. *Nature Reviews Immunology*. 2019;19:517-532.
39. Kroesen BJ, Teteloshvili N, Smigielska-Czepiel K, Brouwer E, Boots AM, van den Berg A, Kluiver J. Immuno-miRs: critical regulators of T-cell development, function and ageing. *Immunology*. 2015;144:1-10.
40. Ye Z, Li G, Kim C, Hu B, Jadhav RR, Weyand CM, Goronzy JJ. Regulation of miR-181a expression in T cell aging. *Nature Communications*. 2018;9:3060.
41. Du X-J, Lu J-M, Sha Y. MiR-181a inhibits vascular inflammation induced by ox-LDL via targeting TLR4 in human macrophages. *Journal of Cellular Physiology*. 2018;233:6996-7003.
42. Xie W, Li Z, Li M, Xu N, Zhang Y. miR-181a and inflammation: miRNA homeostasis response to inflammatory stimuli *in vivo*. *Biochem Biophys Res Commun*. 2013;430:647-652.

- 43.Xie W, Li M, Xu N, Lv Q, Huang N, He J, Zhang Y. miR-181a regulates inflammation responses in monocytes and macrophages. *PLoS One*. 2013;8:e58639.
- 44.Liu G, Min H, Yue S, Chen CZ. Pre-miRNA loop nucleotides control the distinct activities of mir-181a-1 and mir-181c in early T cell development. *PLoS One*. 2008;3:e3592.
- 45.Fragoso R, Mao T, Wang S, Schaffert S, Gong X, Yue S, Luong R, Min H, Yashiro-Ohtani Y, Davis M, Pear W, Chen CZ. Modulating the strength and threshold of NOTCH oncogenic signals by mir-181a-1/b-1. *PLoS Genet*. 2012;8:e1002855.
- 46.Das S, Kohr M, Dunkerly-Eyring B, Lee DI, Bedja D, Kent OA, Leung AK, Henao-Mejia J, Flavell RA, Steenbergen C. Divergent Effects of miR-181 Family Members on Myocardial Function Through Protective Cytosolic and Detrimental Mitochondrial microRNA Targets. *J Am Heart Assoc*. 2017;6



## Figure legends

**Figure 1. Development and validation of miR-181a knockout.** **A**, Example of genotyping strategy used to isolate the miR-181a-1 and miR-181b-1 loci on the wild type allele. **B**, Example of an agarose electrophoresis gel used to identify wildtype (WT), heterozygous (Het) and homozygous (KO) miR-181a/b-1 KO mice, including a non-template control (NTC). Genotypes were distinguished based on the presence of 850 base pair (bp) bands (WT) and 670 bp bands (KO). **C**, Schematic representation of the 5-week experimental protocol timeline. **D**, MicroRNA-181a relative abundance in WT (n=14), miR-181a/b-1 heterozygous (Het, n=10) and homozygous (KO, n=11) KO mice during the active period. Bars represent average values  $\pm$  SEM. Statistical analysis was conducted using one-way analysis of variance. Comparisons are between strains \*\*\* $P < 0.001$  compared to WT.

**Figure 2. Blood pressure of miR-181a/b-1 knockout.** Average 24-hour **A**, systolic blood pressure (SAP), **B**, diastolic blood pressure (DAP), **C**, heart rate (HR) and **D**, activity in WT and miR-181a/b-1 KO mice. The dotted lines show the transition from the active (dark, black panels) periods to the inactive (light, white panel) periods. Histograms (right) represent the average SAP, DAP, HR and activity during the inactive and active periods in each mouse strain. **E**, Heart to body weight ratio (mg/g), **F**, Kidney to body weight ratio (mg/g), **G**, Lung to body weight ratio (mg/g), **H**, Spleen to body weight ratio (mg/g). All values are mean  $\pm$  SEM. **A-D**, statistical analysis was conducted using between groups, split plot analysis of variance with a Bonferroni and Greenhouse Geisser adjustment. **E-H**, 2 factor ANOVA with post hoc Bonferroni adjusted contrasts two-tailed unpaired t-test. \* $P < 0.05$ , \*\* $P < 0.01$ , \*\*\* $P < 0.001$  compared to WT.

**Figure 3. Renal renin and tyrosine hydroxylase in the miR-181a/b-1 knockout.** **A**, Percentage area of the image positively stained for tyrosine hydroxylase (TH) in WT and miR-181a/b-1 KO mice. **B**, Representative micrograph showing TH staining (dark brown) in cortical tubules (scale bar=50  $\mu$ m) of WT and miR-181a/b-1 KO mice. **C**, Representative images of *in situ* hybridisation (top images) and immunohistochemistry (bottom images), with renin shown as brown stain (scale bars=20 $\mu$ m). **D**, Percentage of renin mRNA positive juxtaglomerular apparatus (JGA) and renin protein in the JGA. Bars represent average values  $\pm$  SEM. Statistical analysis was conducted using one-way analysis of variance. Comparisons are between strains \* $P$ <0.05 compared to WT. n=2-5/group.

**Figure 4. Blood pressure in the miR-181a/b-1 knockout response to salt.** Average 24-hour systolic blood pressure (SAP) and diastolic blood pressure (DAP) in WT **A**, and **B**, and miR-181a/b-1 KO mice **C**, and **D**, fed low (white) and high (black) salt diets. The dotted lines show the transition from the active (dark, black panels) periods to the inactive (light, white panel) periods. Histograms (right) represent the average SAP and DAP during the inactive and active periods in each strain. **E**, Average change in mean arterial pressure (MAP) in WT and miR-181a/b-1 KO mice in response to low and high salt diets. Statistical analysis was conducted using between groups, split plot analysis of variance with a Bonferroni and Greenhouse Geisser adjustment \* $P$ <0.05.

**Figure 5. Isolation and analysis of kidney cells by scRNA-seq.** **A**, schematic outline of procedure to isolate and analysing cell types from control and miR181a/b-1 KO mouse kidneys. **B**, t-SNE projection of kidney cell types identified by scRNA-seq. **C**, Top-five distinct genes for each cell type using an unsupervised approach (please see Table S1 for top 10 gene markers

per cell population). Legend: Gran, granulocytes; PT, proximal tubules; NK cells, natural killer cells; DCs, dendritic cells tubule; JGC, juxtaglomerular cells; CD-PT, collecting duct principal cells.

**Figure 6. Gene expression changes in miR181a/b-1 KO kidney cell populations. A,** Lollipop plot summarizing the number of up- and down-regulated genes (uncorrected  $P < 0.01$ , see Table S2). **B,** dot plot summarizing top-ten genes up- or down-regulated within kidney cell types of miR181a/b-1 KO mice relative to control mice. Circle size indicates fold-change; circle saturation indicates relative expression level (dark= high, clear = low); black dots at the centre of circles indicates uncorrected  $P < 0.01$ . **C,** Gene ontology pathways dysregulated in miR-181a/b-1 KO (please see Tables S3 and S4 for complete gene ontology). Legend: CD-PT, collecting duct principal cells DC, dendritic cells; JGC, juxtaglomerular cells; GO; gene ontology; Gran, granulocytes; NK cells, natural killer; PT, proximal tubules.

# Figures

## Figure 1

**A**

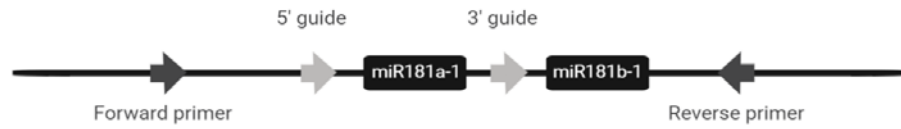

**C**

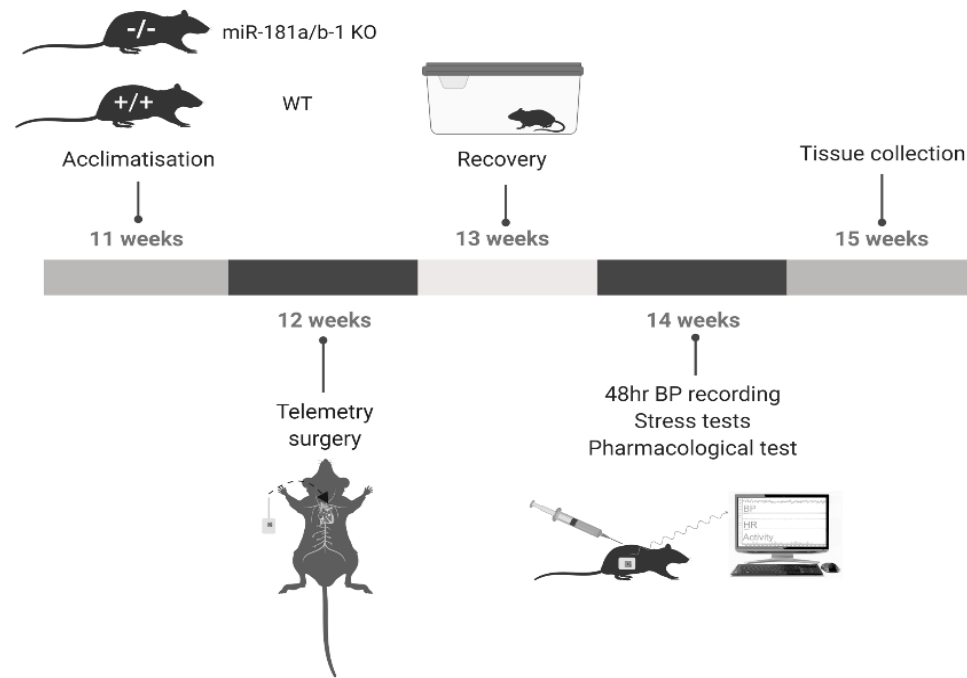

**B**

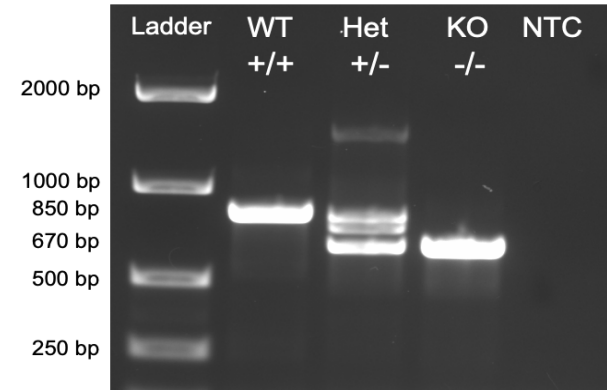

**D**

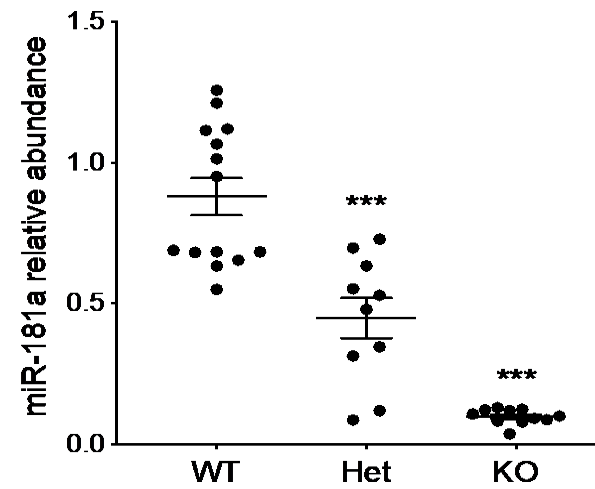

Figure 2

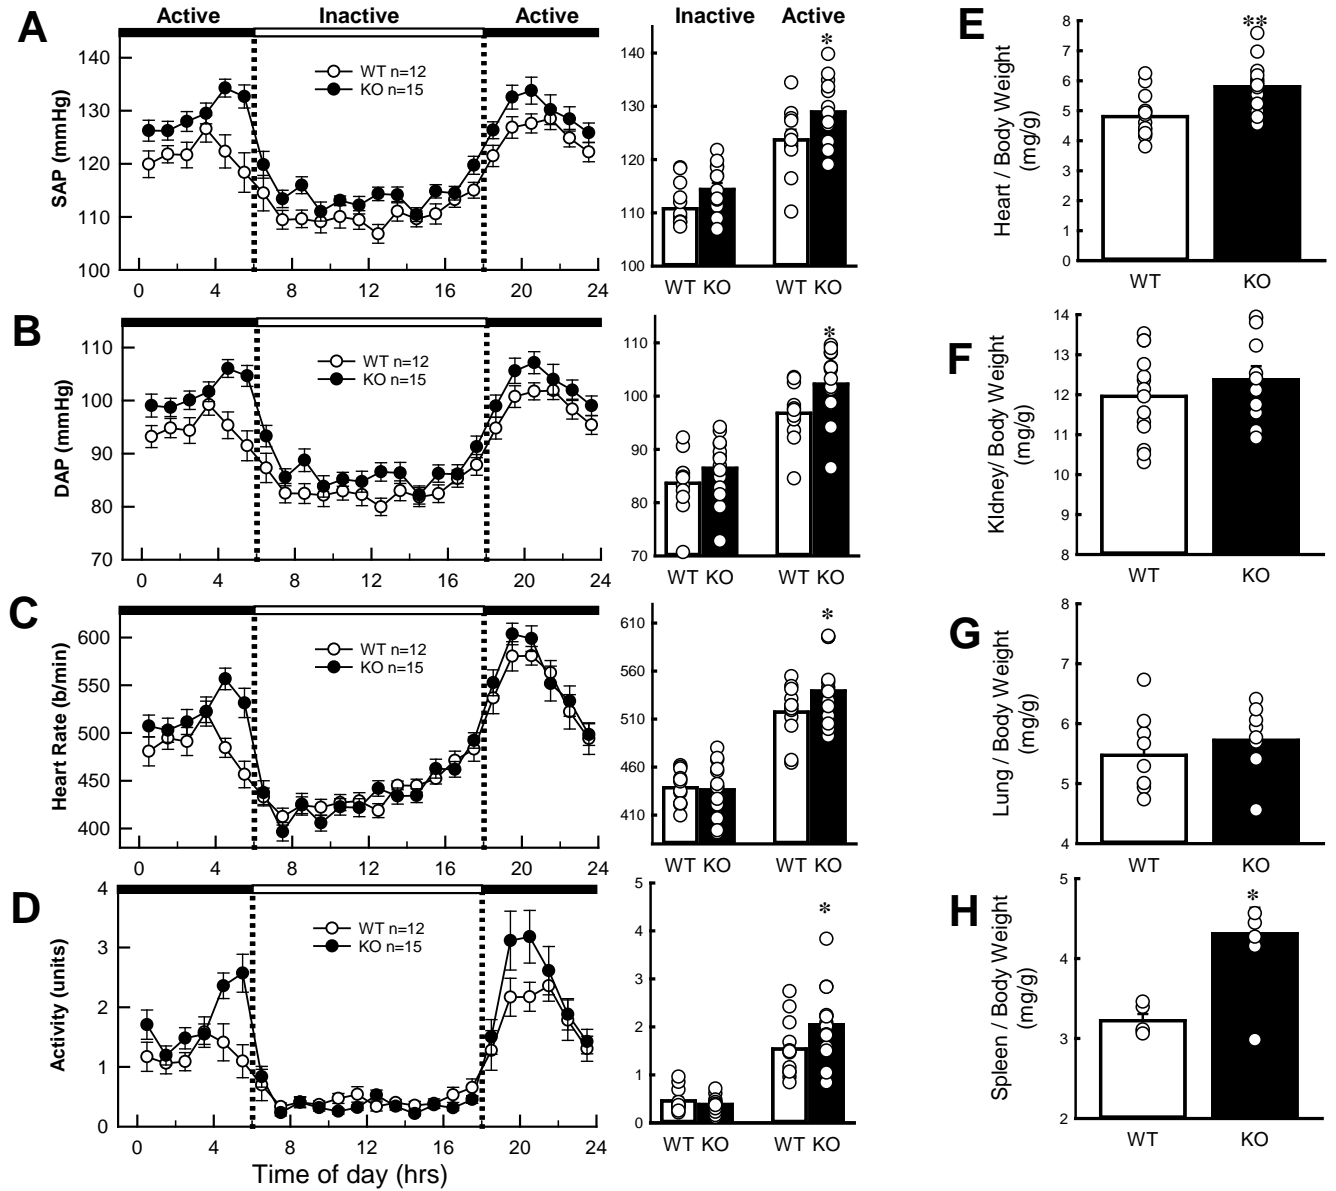

**Figure 3**

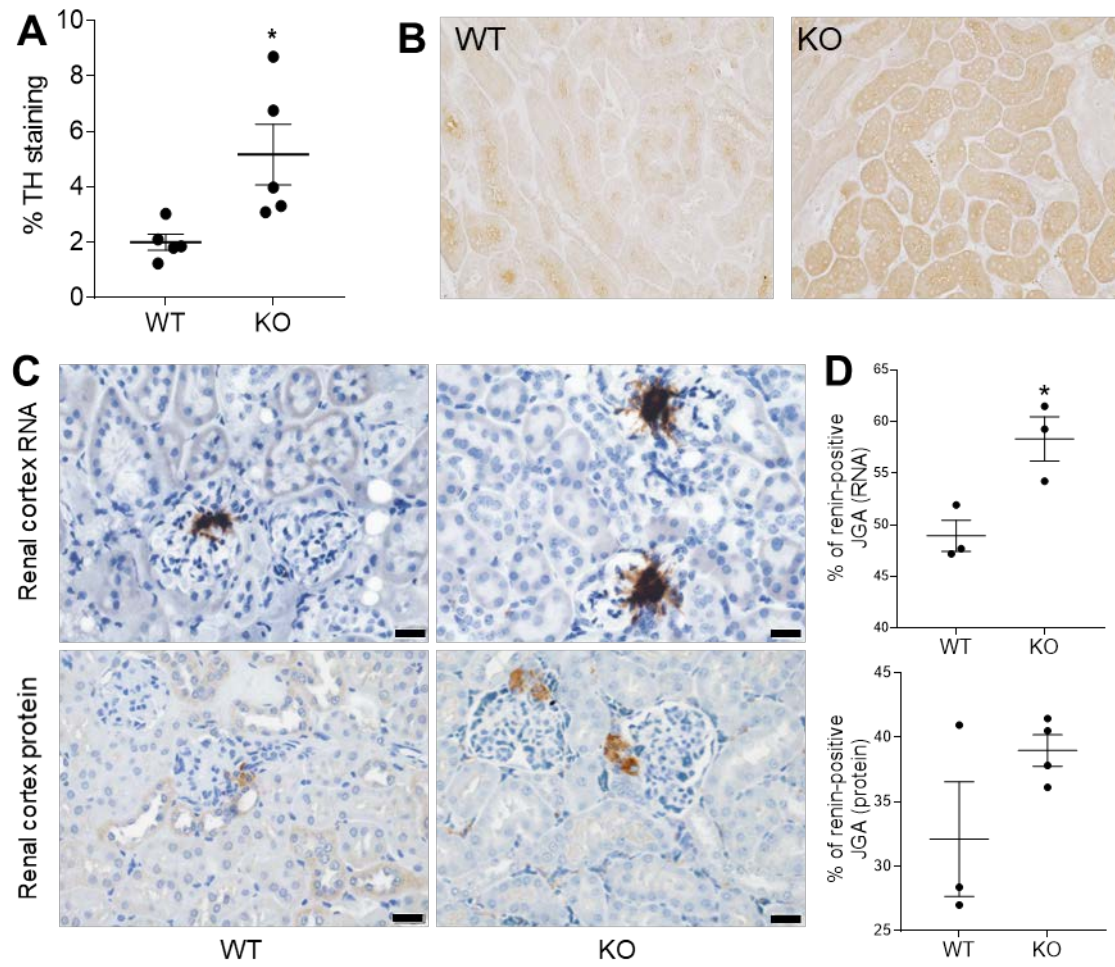

**Figure 4**

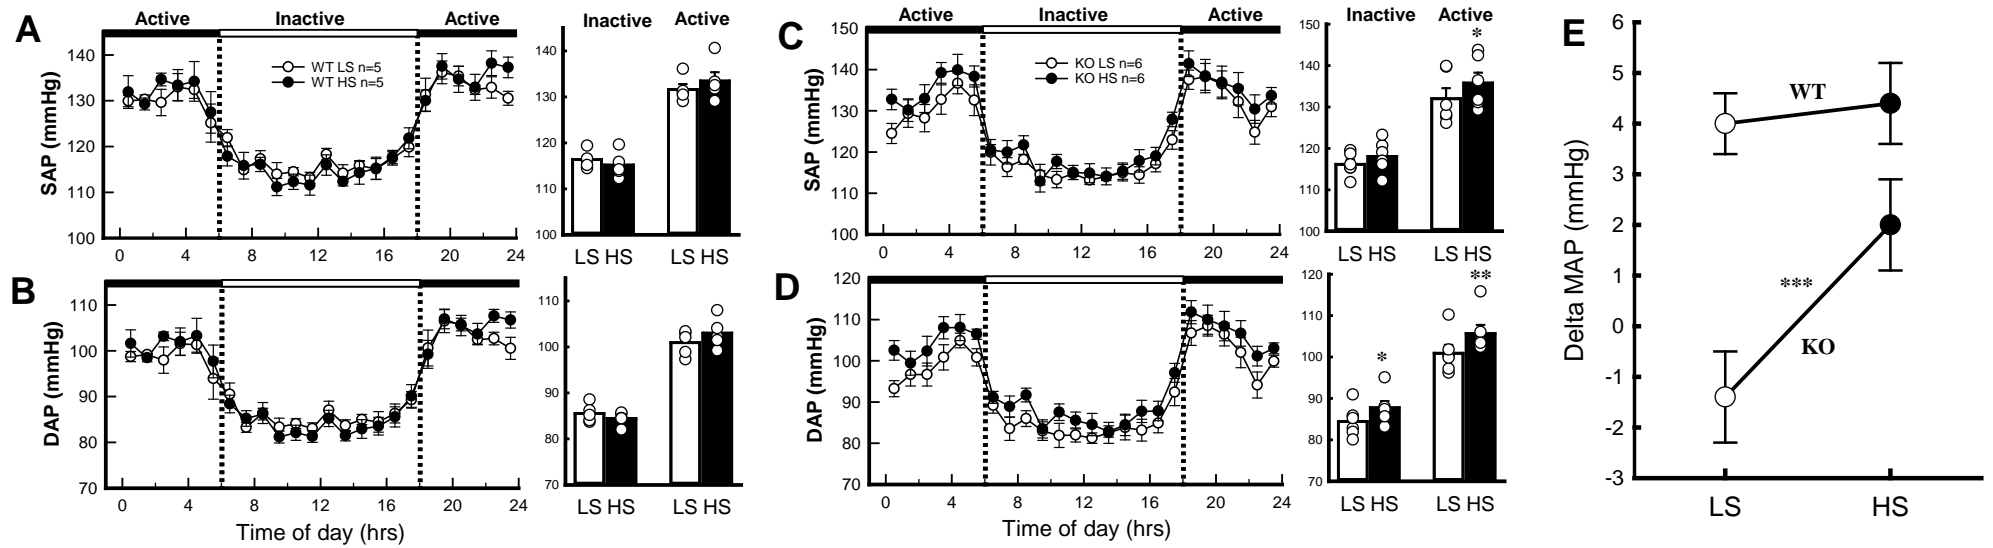

Figure 5

A

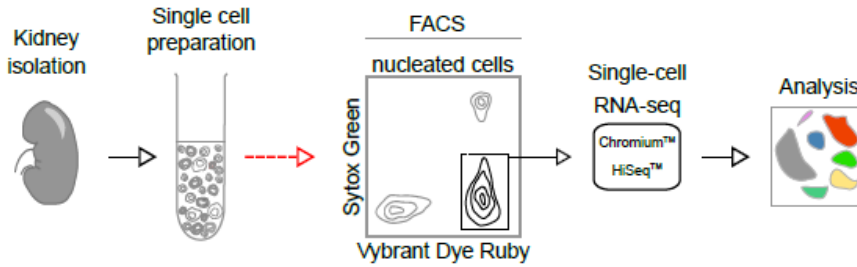

B

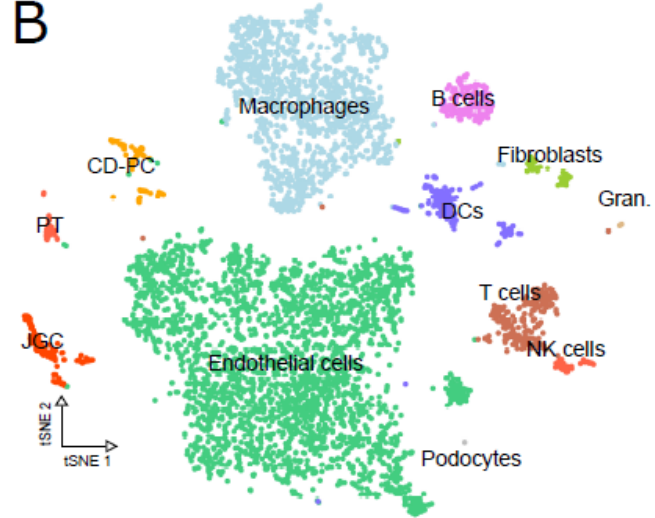

C

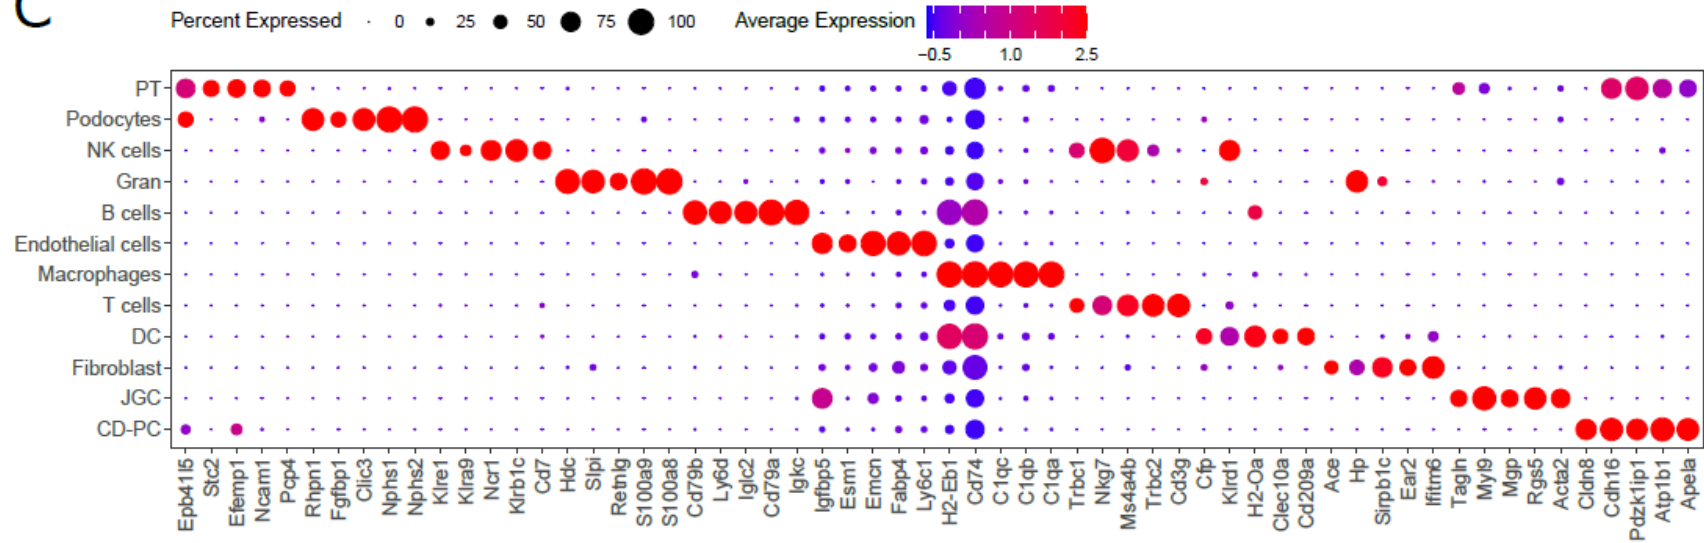



**Figure 6**

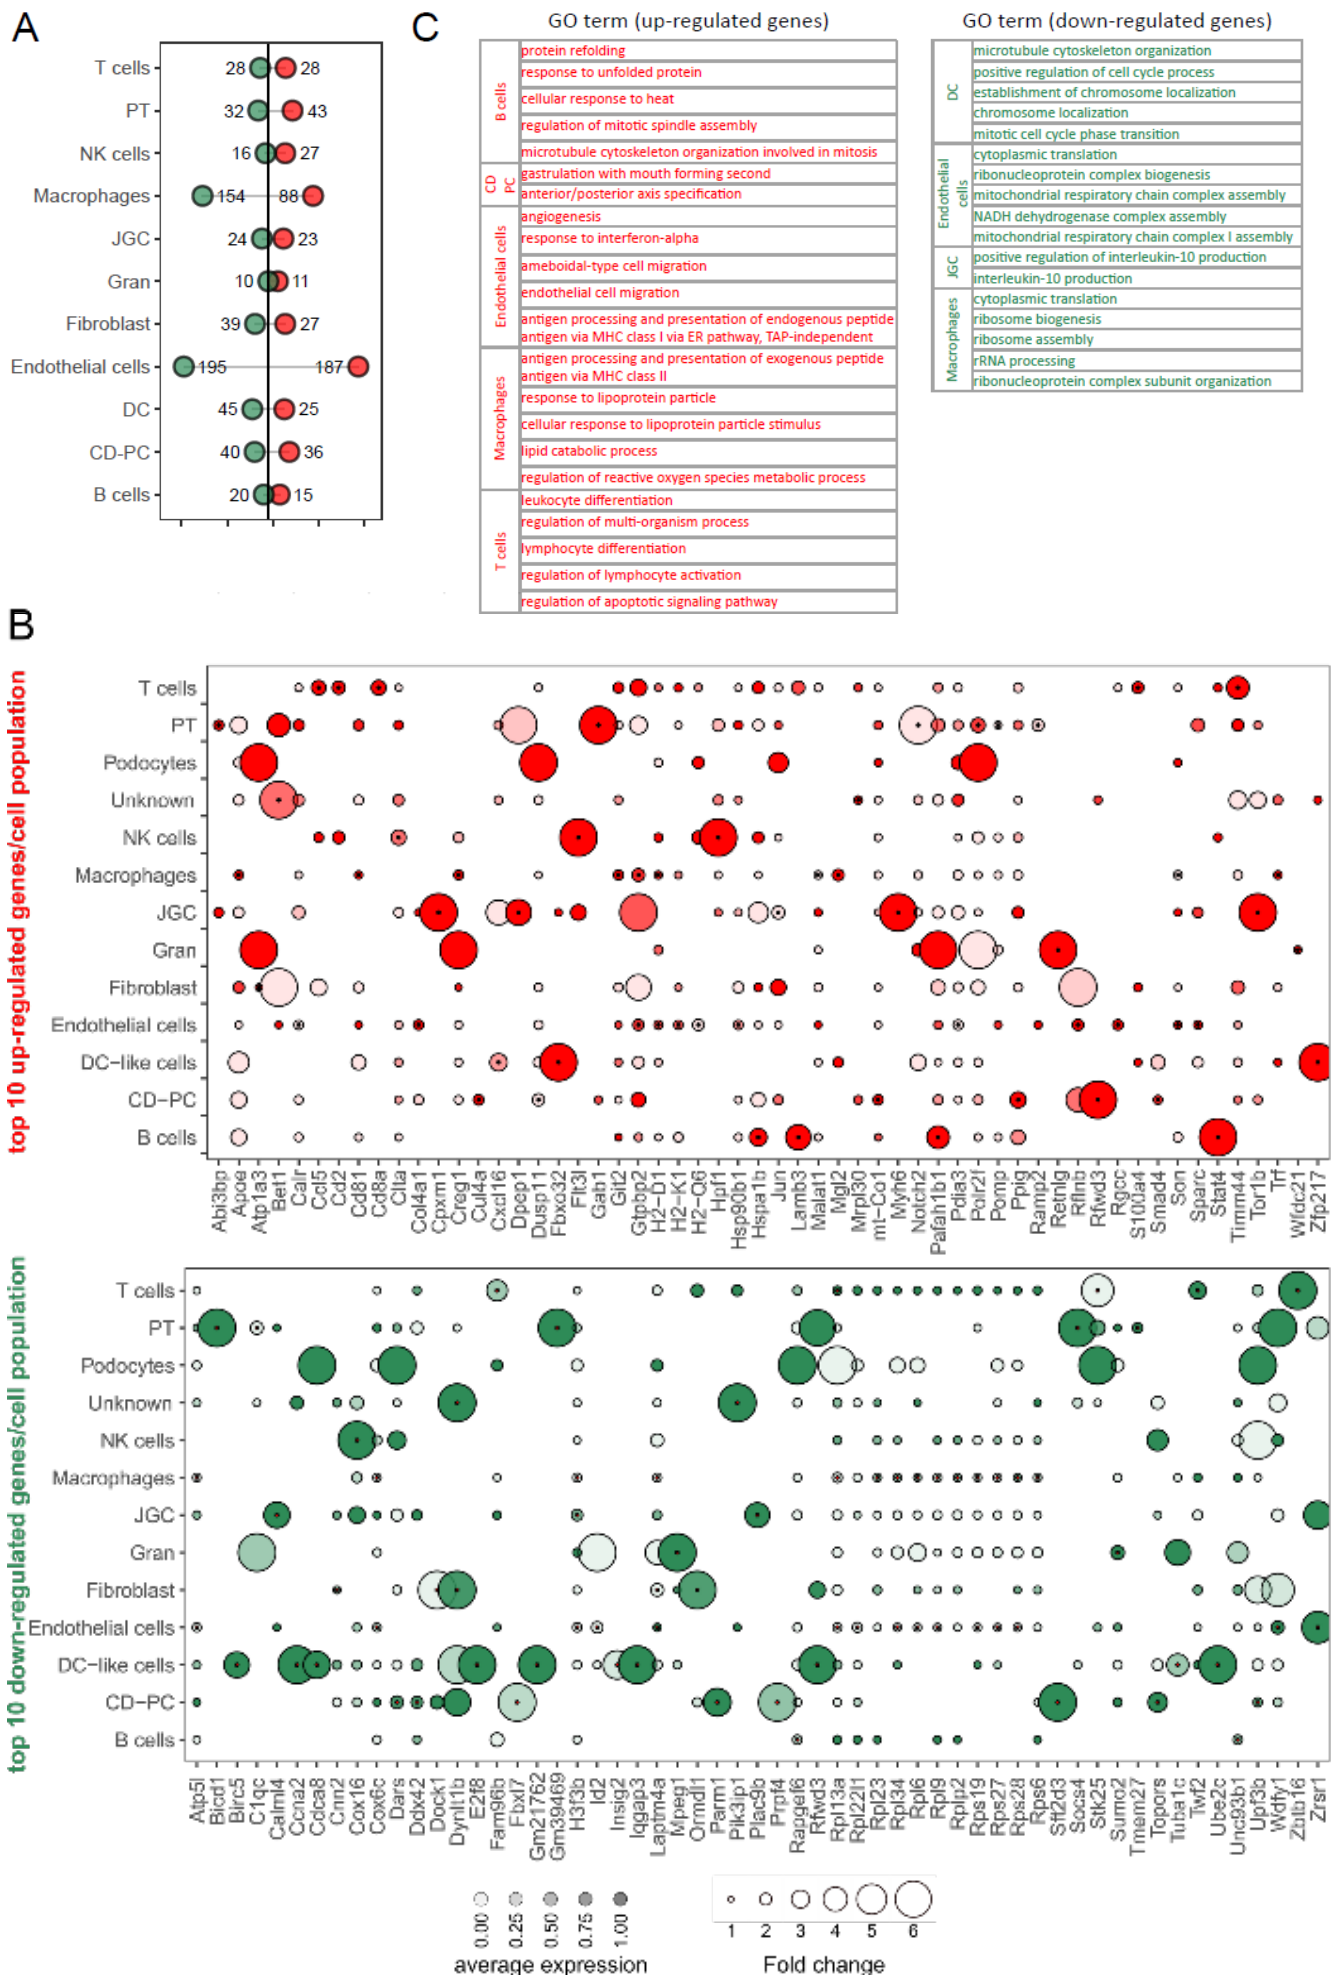

Source: http://biorxiv.org/content/10.1101/2021.03.18.436092v1.full.pdf
